# Supplementary material for: Dynamic allostery in substrate binding by human thymidylate synthase
Source: eLife. 2022 Oct 6;11:e79915. doi: 10.7554/eLife.79915 (PMC9536839; doi:10.7554/eLife.79915)
Supplement: Supplementary file 1. — (a) values from global fit with pb≅1.3%, kex,ab=240s-1 (b) population and exchange rate shown for slower of two processes. Unlike the B↔A↔C model, which gives very similar pb and kex,ab for individual fits of these probes, the A↔B↔C model yields heterogeneous values, primarily for the exchange rate (c) χred2 is calculated as ∑iresidualierrori2numdatapoints-numfitparam [file elife-79915-supp1.docx]

|  | 2-state | B↔A↔Ca | A↔B↔Cb |
| --- | --- | --- | --- |
| V79 | c |  |  |
| L101 |  |  |  |
| L121 |  |  |  |
| L131 |  |  |  |
| L192 |  |  |  |
| L198 |  |  |  |
| L221 |  |  |  |
| I237 |  |  |  |
