# Supplementary material for: Dynamic allostery in substrate binding by human thymidylate synthase
Source: eLife. 2022 Oct 6;11:e79915. doi: 10.7554/eLife.79915 (PMC9536839; doi:10.7554/eLife.79915)
Supplement: Supplementary file 4. — All probes are fit to a 2-state model. Color-coding and values in parenthesis are as described in Supplementary file 2. [file elife-79915-supp4.docx]

| Residue (met group) |  |  |  |  |
| --- | --- | --- | --- | --- |
| L41 (met 2) |  | (20,20,970) |  | - |
| L73 (met 2) | (0.1,0.1,0.6) |  |  | - |
| L73 (met 1) | (0.1,0.1,0.6) |  |  | - |
| V79 (met 1) | (0.1,0.1,1.1) | (100,200,10200) |  | - |
| L101 (met 1) | (0.1,0.1,2.3) |  |  | - |
| L118 (met 1) |  |  |  | - |
| L121 (met 1) |  |  |  | - |
| L192 (met 1) |  |  |  |  |
| L198 (met 2) |  |  |  | - |
| L212 (met 1) | (0.1,0.1,1.0) |  |  | - |
| L221 (met 1) |  |  |  | - |
| L259 (met 1) |  |  |  | - |
| L269 (met 2) | (0.1,0.2,0.5) |  |  | - |
| L279 (met 1) |  |  |  | - |
| L279 (met 2) |  |  |  | - |
| V285 (met 2) |  |  |  | - |
