# Supplementary material for: Dynamic allostery in substrate binding by human thymidylate synthase
Source: eLife. 2022 Oct 6;11:e79915. doi: 10.7554/eLife.79915 (PMC9536839; doi:10.7554/eLife.79915)
Supplement: Supplementary file 6. — Rotational correlation times for various hTS-bound states determined by 15N relaxation (Source data 1–19). [file elife-79915-supp6.docx]

| **hTS bound state** |  |
| --- | --- |
| apo |  |
| dUMP |  |
| TMP |  |
| Δ25 apo |  |
| Δ25 dUMP |  |
