# Supplementary material for: Dynamic allostery in substrate binding by human thymidylate synthase
Source: eLife. 2022 Oct 6;11:e79915. doi: 10.7554/eLife.79915 (PMC9536839; doi:10.7554/eLife.79915)
Supplement: Supplementary file 8. [file elife-79915-supp8.docx]

| Residue (met group) | S2axis | Error |
| --- | --- | --- |
| 3met1 | 0.051 | 0.003 |
| 3met2 | 0.063 | 0.003 |
| 31met1 | 0.67 | 0.02 |
| 34met1 | 0.92 | 0.05 |
| 37 | 0.39 | 0.02 |
| 40 | 0.88 | 0.04 |
| 41met1 | 0.92 | 0.04 |
| 41met2 | 0.75 | 0.03 |
| 56met1 | 0.69 | 0.03 |
| 58met2 | 0.53 | 0.03 |
| 67met1 | 1.02 | 0.05 |
| 67met2 | 0.9 | 0.04 |
| 73met2 | 0.73 | 0.04 |
| 73met1 | 0.75 | 0.05 |
| 74met2 | 0.79 | 0.06 |
| 85met1 | 0.84 | 0.04 |
| 85met2 | 0.76 | 0.04 |
| 88met1 | 0.6 | 0.04 |
| 88met2 | 0.83 | 0.04 |
| 89met2 | 0.89 | 0.05 |
| 89met1 | 0.77 | 0.03 |
| 92 | 0.93 | 0.02 |
| 101met2 | 0.84 | 0.05 |
| 108 | 0.64 | 0.02 |
| 121met1 | 0.73 | 0.03 |
| 158met2 | 1 | 0.05 |
| 158met1 | 0.61 | 0.07 |
| 165 | 0.65 | 0.02 |
| 168 | 0.91 | 0.03 |
| 178 | 0.38 | 0.02 |
| 187met1 | 0.28 | 0.01 |
| 187met2 | 0.25 | 0.02 |
| 189met1 | 0.58 | 0.02 |
| 192met2 | 0.4 | 0.02 |
| 192met1 | 0.42 | 0.02 |
| 198met1 | 0.38 | 0.02 |
| 198met2 | 0.42 | 0.02 |
| 203met1 | 0.77 | 0.07 |
| 208met1 | 0.95 | 0.06 |
| 221met2 | 0.43 | 0.02 |
| 232met2 | 0.9 | 0.04 |
| 232met1 | 0.91 | 0.05 |
| 233met1 | 0.91 | 0.05 |
| 237 | 0.45 | 0.03 |
| 240 | 0.77 | 0.02 |
| 243met1 | 0.94 | 0.06 |
| 257 | 0.88 | 0.03 |
| 259met2 | 0.54 | 0.03 |
| 262 | 0.63 | 0.01 |
| 267 | 0.407 | 0.006 |
| 269met1 | 0.47 | 0.01 |
| 269met2 | 0.39 | 0.02 |
| 279met1 | 0.72 | 0.03 |
| 279met2 | 0.67 | 0.05 |
| 281 | 0.75 | 0.03 |
| 282met1 | 0.58 | 0.01 |
| 288 | 0.349 | 0.008 |
| 298 | 0.49 | 0.01 |
| 307 | 0.59 | 0.03 |
| 313met1 | 0.072 | 0.003 |
| 313met2 | 0.066 | 0.004 |
